# Supplementary material for: Atherosclerotic Cardiovascular Disease Risk Prediction in Disaggregated Asian and Hispanic Subgroups Using Electronic Health Records
Source: PubMed Central journal article supplement — J Am Heart Assoc. 2019 Jul 11;8(14):e011874. doi: 10.1161/JAHA.118.011874 (PMC6662141; doi:10.1161/jaha.118.011874), 2019-07-11
Supplement: JAH3-8-e011874-s001.pdf [file JAH3-8-e011874-s001.pdf]

# **SUPPLEMENTAL MATERIAL**

**Table S1. ASCVD Incidence by race/ethnicity\*.**

|                  | <b>N</b> | <b>Total<br/>ASCVD<br/>Events</b> | <b>Total<br/>ASCVD</b> | <b>MI</b> | <b>Ischemic<br/>stroke</b> | <b>Hemorrhagic<br/>stroke</b> | <b>Fatal CAD</b> |
|------------------|----------|-----------------------------------|------------------------|-----------|----------------------------|-------------------------------|------------------|
| All              | 231,622  | 2,703                             | 1.20%                  | 0.39%     | 0.54%                      | 0.18%                         | 0.06%            |
| NHW              | 151,615  | 1,894                             | 1.20%                  | 0.41%     | 0.58%                      | 0.18%                         | 0.08%            |
| African American | 4,117    | 53                                | 1.30%                  | 0.41%     | 0.80%                      | 0.05%                         | 0.02%            |
| Asian            | 56,130   | 494                               | 0.90%                  | 0.30%     | 0.37%                      | 0.18%                         | 0.02%            |
| Hispanic         | 19,760   | 262                               | 1.30%                  | 0.43%     | 0.61%                      | 0.26%                         | 0.04%            |
| Chinese          | 23,171   | 166                               | 0.70%                  | 0.21%     | 0.34%                      | 0.17%                         | 0.00%            |
| Indian           | 13,815   | 123                               | 0.90%                  | 0.41%     | 0.29%                      | 0.17%                         | 0.02%            |
| Filipino         | 6,220    | 72                                | 1.20%                  | 0.50%     | 0.43%                      | 0.13%                         | 0.10%            |
| Japanese         | 3,825    | 41                                | 1.10%                  | 0.24%     | 0.58%                      | 0.24%                         | 0.03%            |
| Korean           | 1,793    | 13                                | 0.70%                  | 0.17%     | 0.33%                      | 0.22%                         | 0.00%            |
| Vietnamese       | 2,093    | 26                                | 1.20%                  | 0.43%     | 0.57%                      | 0.19%                         | 0.05%            |
| Other Asian      | 5,213    | 53                                | 1.00%                  | 0.29%     | 0.46%                      | 0.25%                         | 0.02%            |
| Mexican          | 8,655    | 115                               | 1.30%                  | 0.40%     | 0.70%                      | 0.22%                         | 0.00%            |
| Puerto Rican     | 457      | 7                                 | 1.50%                  | 0.44%     | 0.66%                      | 0.44%                         | 0.00%            |
| Other Hispanic   | 10,643   | 140                               | 1.30%                  | 0.44%     | 0.53%                      | 0.28%                         | 0.07%            |

\*During study period with average follow-up time of 3.9 years

ASCVD = atherosclerotic cardiovascular disease; MI = myocardial infarction; CAD = coronary artery disease

The table shows the incidence of ASCVD events during follow-up. Only the first occurrence of an ASCVD event was counted.

**Table S2. Observed and PCE Predicted ASCVD Risk by PCE-predicted 10-year Risk Category and Race/ethnicity.**

|                         | <b>PCE 10yr risk category</b> | <b>Observed</b> | <b>PCE predicted 5yr ASCVD</b> | <b>Ch-sq</b> | <b>P-Val</b> |
|-------------------------|-------------------------------|-----------------|--------------------------------|--------------|--------------|
| <b>ALL</b>              | <5%                           | 0.4%            | 0.5%                           | 490.5        | <0.001       |
|                         | <7.5%                         | 1.4%            | 1.9%                           |              |              |
|                         | <10%                          | 1.6%            | 2.8%                           |              |              |
|                         | 10+%                          | 4.0%            | 6.4%                           |              |              |
| <b>NHW</b>              | <5%                           | 0.5%            | 0.6%                           | 351.4        | <0.001       |
|                         | <7.5%                         | 1.4%            | 1.9%                           |              |              |
|                         | <10%                          | 1.7%            | 2.8%                           |              |              |
|                         | 10+%                          | 4.0%            | 6.4%                           |              |              |
| <b>African American</b> | <5%                           | 0.4%            | 0.7%                           | 14.9         | <0.001       |
|                         | <7.5%                         | 1.5%            | 1.9%                           |              |              |
|                         | <10%                          | 0.9%            | 2.9%                           |              |              |
|                         | 10+%                          | 3.5%            | 5.8%                           |              |              |
| <b>Asian</b>            | <5%                           | 0.4%            | 0.5%                           | 120.0        | <0.001       |
|                         | <7.5%                         | 1.2%            | 1.9%                           |              |              |
|                         | <10%                          | 1.1%            | 2.7%                           |              |              |
|                         | 10+%                          | 3.7%            | 6.6%                           |              |              |
| <b>Hispanic</b>         | <5%                           | 0.5%            | 0.5%                           | 18.0         | <0.001       |
|                         | <7.5%                         | 1.7%            | 1.9%                           |              |              |
|                         | <10%                          | 1.9%            | 2.6%                           |              |              |
|                         | 10+%                          | 4.7%            | 6.5%                           |              |              |
| <b>Chinese</b>          | <5%                           | 0.3%            | 0.5%                           | 78.6         | <0.001       |
|                         | <7.5%                         | 1.0%            | 2.0%                           |              |              |
|                         | <10%                          | 0.9%            | 2.8%                           |              |              |
|                         | 10+%                          | 3.2%            | 6.7%                           |              |              |
| <b>Asian Indian</b>     | <5%                           | 0.4%            | 0.5%                           | 13.1         | <0.001       |
|                         | <7.5%                         | 1.5%            | 1.9%                           |              |              |
|                         | <10%                          | 1.1%            | 2.7%                           |              |              |
|                         | 10+%                          | 4.6%            | 6.4%                           |              |              |
| <b>Filipino</b>         | <5%                           | 0.5%            | 0.5%                           |              |              |
|                         | <7.5%                         | 1.7%            | 1.9%                           |              |              |

|                       |       |      |      |      |        |
|-----------------------|-------|------|------|------|--------|
|                       | <10%  | 1.8% | 2.8% |      |        |
|                       | 10+%  | 3.8% | 6.6% | 14.3 | <0.001 |
| <b>Japanese</b>       | <5%   | 0.4% | 0.5% |      |        |
|                       | <7.5% | 0.6% | 2.0% |      |        |
|                       | <10%  | 1.0% | 2.9% |      |        |
|                       | 10+%  | 3.9% | 7.4% | 16.5 | <0.001 |
| <b>Korean</b>         | <5%   | 0.3% | 0.4% |      |        |
|                       | <7.5% | 0.9% | 1.7% |      |        |
|                       | <10%  | 1.9% | 2.5% |      |        |
|                       | 10+%  | 3.0% | 6.5% | 4.5  | 0.107  |
| <b>Vietnamese</b>     | <5%   | 1.0% | 0.5% |      |        |
|                       | <7.5% | 0.7% | 2.0% |      |        |
|                       | <10%  | 1.1% | 2.7% |      |        |
|                       | 10+%  | 4.6% | 6.2% | 12.0 | 0.002  |
| <b>Other Asian</b>    | <5%   | 0.5% | 0.4% |      |        |
|                       | <7.5% | 1.1% | 1.7% |      |        |
|                       | <10%  | 1.5% | 2.5% |      |        |
|                       | 10+%  | 4.0% | 5.5% | 6.7  | 0.036  |
| <b>Mexican</b>        | <5%   | 0.5% | 0.5% |      |        |
|                       | <7.5% | 1.7% | 1.9% |      |        |
|                       | <10%  | 1.9% | 2.8% |      |        |
|                       | 10+%  | 4.4% | 6.7% | 12.8 | 0.002  |
| <b>Puerto Rican</b>   | <5%   | 0.9% | 0.5% |      |        |
|                       | <7.5% | 0.0% | 2.2% |      |        |
|                       | <10%  | 4.3% | 3.1% |      |        |
|                       | 10+%  | 4.8% | 6.5% | 1.9  | 0.4    |
| <b>Other Hispanic</b> | <5%   | 0.5% | 0.5% |      |        |
|                       | <7.5% | 1.8% | 1.8% |      |        |
|                       | <10%  | 1.8% | 2.4% |      |        |
|                       | 10+%  | 4.9% | 6.3% | 5.9  | 0.1    |

**Table S3. Pooled Cohort Equation Discrimination using African American Parameters among Hispanics.**

| <b>Race/Ethnic Subgroup</b> | <b>PCE</b>              | <b>Recalibrated PCE</b> | <b>p-value for comparison</b> |
|-----------------------------|-------------------------|-------------------------|-------------------------------|
|                             | <b>C-index (95% CI)</b> | <b>C-index (95% CI)</b> |                               |
| All Hispanics               | 0.75 (0.71, 0.78)       | 0.78 (0.75, 0.80)       | 0.043                         |
| Mexican                     | 0.74 (0.69, 0.80)       | 0.78 (0.73, 0.82)       | 0.095                         |
| Puerto Rican                | 0.67 (0.41, 0.88)       | 0.67 (0.43, 0.89)       | 0.960                         |
| Other Hispanic              | 0.76 (0.71, 0.80)       | 0.78 (0.74, 0.82)       | 0.160                         |
